# Supplementary material for: Behavioral comorbidities treatment by fecal microbiota transplantation in canine epilepsy: a pilot study of a novel therapeutic approach
Source: Frontiers journal article supplement (doi:10.3389/fvets.2024.1385469), 2024-06-21
Supplement: Data_Sheet_1.pdf [file Data_Sheet_1.pdf]

## **Supplementary file 1: seizure seminology questionnaire**

### **1. How old was your dog, when he/she had the first seizure?**

- ☐ < 1 year old      ☐ 2 years old      ☐ 3 years old      ☐ 4 years old  
☐ 5 years old      ☐ 6 years old

### **2. When did your dog have the last seizure?**

- ☐ In the last 24 hours  
☐ In the last 7 days  
☐ In the last 30 days  
☐ 1-3 months ago  
☐ > 3 months ago

### **3. What does the seizure of your dog look like?**

- ☐ Generalized seizure of the whole body without consciousness and with or without urination or defecation  
☐ Focal seizure such as twitching of one of the body parts such as face, lip, eye, or leg.  
☐ Starting with a focal seizure before developing to a generalized seizure

### **4. Which signs did your dog have before the seizure (preictal phase)?**

- ☐ Hiding/ isolation  
☐ Nervous  
☐ Staying close/ needs attention  
☐ Restlessness  
☐ Fear  
☐ Whining  
☐ Shivering  
☐ Hypersalivation  
☐ Tiredness/ being sleepy  
☐ Sniffing  
☐ Hungry  
☐ Thirsty  
☐ Completely normal - none of the signs mentioned above

### **5. Which signs did your dog have after the seizure (postictal phase)?**

- ☐ Disorientation  
☐ Ataxia  
☐ Staring blankly in the air  
☐ Clingy/ needs attention  
☐ Complete or partial vision loss  
☐ Tiredness/ being sleepy  
☐ Fear  
☐ Aggression  
☐ Restlessness  
☐ Sniffing

- ☐ Hungry
- ☐ Thirsty
- ☐ Completely normal - none of the signs mentioned above

**6. How many seizures did your dog have in the last three months?**

- ☐ 1
- ☐ 2-5
- ☐ 6-10
- ☐ 10-20
- ☐ > 20

**7. How long did the average seizure last?**

- ☐ < 1 min
- ☐ 1-2 min
- ☐ 3-5 min
- ☐ 6-10 min
- ☐ > 10 min

**8. Has your dog ever had a seizure that lasted more than 5 min (status epilepticus)?**

- ☐ Yes
- ☐ No, always less than 5 min

**9. Has your dog ever had at least two seizures in 24 hours (cluster seizure)?**

- ☐ Yes
- ☐ No, only one seizure in 24 hours

**10. If yes, how many seizures did your dog have in 24 hours?**

- ☐ 2 seizures
- ☐ 3-5 seizures
- ☐ > 5 seizures
